# Supplementary material for: Long-Term Dose-Response Condensed Tannin Supplementation Does Not Affect Iron Status or Bioavailability
Source: PubMed Central journal article supplement — Curr Dev Nutr. 2017 Sep 11;1(10):e001081. doi: 10.3945/cdn.117.001081 (PMC5998780; doi:10.3945/cdn.117.001081), 2017-09-11
Supplement: cdn001081supplementarydata1.pdf [file cdn001081supplementarydata1.pdf]

## Supplemental Results

Hemoglobin:

| Table of Hb by previous |                    |      |     |       |
|-------------------------|--------------------|------|-----|-------|
| Hb(Hb)                  | previous(previous) |      |     |       |
| Frequency               | 0                  | 0.03 | 1.5 | Total |
| drop                    | 1                  | 3    | 0   | 4     |
| improve                 | 1                  | 3    | 1   | 5     |
| maintain                | 0                  | 0    | 2   | 2     |
| Total                   | 2                  | 6    | 3   | 11    |

| Statistic                                                                                               | DF | Value  | Prob   |
|---------------------------------------------------------------------------------------------------------|----|--------|--------|
| Chi-Square                                                                                              | 4  | 6.9667 | 0.1377 |
| Likelihood Ratio Chi-Square                                                                             | 4  | 7.8869 | 0.0958 |
| Mantel-Haenszel Chi-Square                                                                              | 1  | 5.2673 | 0.0217 |
| Phi Coefficient                                                                                         |    | 0.7958 |        |
| Contingency Coefficient                                                                                 |    | 0.6227 |        |
| Cramer's V                                                                                              |    | 0.5627 |        |
| <b>WARNING: 100% of the cells have expected counts less than 5. Chi-Square may not be a valid test.</b> |    |        |        |

| Fisher's Exact Test   |            |
|-----------------------|------------|
| Table Probability (P) | 0.017<br>3 |
| Pr <= P               | 0.225<br>1 |

Ferritin

| Table of Ferritin by previous |                    |      |     |       |
|-------------------------------|--------------------|------|-----|-------|
| Ferritin(Ferritin)            | previous(previous) |      |     |       |
| Frequency                     | 0                  | 0.03 | 1.5 | Total |
| drop                          | 2                  | 3    | 0   | 5     |
| improve                       | 0                  | 2    | 3   | 5     |
| maintain                      | 0                  | 1    | 0   | 1     |
| <b>Total</b>                  | 2                  | 6    | 3   | 11    |

| Statistic                                                                                               | DF | Value  | Prob   |
|---------------------------------------------------------------------------------------------------------|----|--------|--------|
| Chi-Square                                                                                              | 4  | 6.6000 | 0.1586 |
| Likelihood Ratio Chi-Square                                                                             | 4  | 8.4281 | 0.0771 |
| Mantel-Haenszel Chi-Square                                                                              | 1  | 1.2447 | 0.2646 |
| Phi Coefficient                                                                                         |    | 0.7746 |        |
| Contingency Coefficient                                                                                 |    | 0.6124 |        |
| Cramer's V                                                                                              |    | 0.5477 |        |
| <b>WARNING: 100% of the cells have expected counts less than 5. Chi-Square may not be a valid test.</b> |    |        |        |

| Fisher's Exact Test   |        |
|-----------------------|--------|
| Table Probability (P) | 0.0216 |
| Pr <= P               | 0.1775 |

% Max iron absorption

| Table of iron_abs by previous |                    |      |     |       |
|-------------------------------|--------------------|------|-----|-------|
| iron_abs(iron abs)            | previous(previous) |      |     |       |
| Frequency                     | 0                  | 0.03 | 1.5 | Total |
| drop                          | 0                  | 1    | 2   | 3     |
| improve                       | 2                  | 5    | 1   | 8     |
| Total                         | 2                  | 6    | 3   | 11    |

| Statistic                                                                                               | DF | Value  | Prob   |
|---------------------------------------------------------------------------------------------------------|----|--------|--------|
| Chi-Square                                                                                              | 2  | 3.4375 | 0.1793 |
| Likelihood Ratio Chi-Square                                                                             | 2  | 3.6651 | 0.1600 |
| Mantel-Haenszel Chi-Square                                                                              | 1  | 2.9584 | 0.0854 |
| Phi Coefficient                                                                                         |    | 0.5590 |        |
| Contingency Coefficient                                                                                 |    | 0.4880 |        |
| Cramer's V                                                                                              |    | 0.5590 |        |
| <b>WARNING: 100% of the cells have expected counts less than 5. Chi-Square may not be a valid test.</b> |    |        |        |

| Fisher's Exact Test   |        |
|-----------------------|--------|
| Table Probability (P) | 0.1091 |
| Pr <= P               | 0.2061 |

iAUC:

| Table of AUC by previous |                    |      |     |       |
|--------------------------|--------------------|------|-----|-------|
| AUC(AUC)                 | previous(previous) |      |     |       |
| Frequency                | 0                  | 0.03 | 1.5 | Total |
| drop                     | 0                  | 4    | 1   | 5     |
| improve                  | 2                  | 2    | 2   | 6     |
| Total                    | 2                  | 6    | 3   | 11    |

| Statistic                   | DF | Value  | Prob   |
|-----------------------------|----|--------|--------|
| Chi-Square                  | 2  | 2.9333 | 0.2307 |
| Likelihood Ratio Chi-Square | 2  | 3.7009 | 0.1572 |
| Mantel-Haenszel Chi-Square  | 1  | 0.1980 | 0.6563 |
| Phi Coefficient             |    | 0.5164 |        |
| Contingency Coefficient     |    | 0.4588 |        |
| Cramer's V                  |    | 0.5164 |        |

**WARNING: 100% of the cells have expected counts less than 5. Chi-Square may not be a valid test.**

| Fisher's Exact Test   |        |
|-----------------------|--------|
| Table Probability (P) | 0.0974 |
| Pr <= P               | 0.4156 |
