# Supplementary material for: Long-Term Dose-Response Condensed Tannin Supplementation Does Not Affect Iron Status or Bioavailability
Source: PubMed Central journal article supplement — Curr Dev Nutr. 2017 Sep 11;1(10):e001081. doi: 10.3945/cdn.117.001081 (PMC5998780; doi:10.3945/cdn.117.001081), 2017-09-11
Supplement: cdn001081supplementarydata3.pdf [file cdn001081supplementarydata3.pdf]

## Supplemental Table

| Participant | Value                                   | 0.03 g | 0.03 g | 0.25 g | 0.25 g | 1.5 g  | 1.5 g  |
|-------------|-----------------------------------------|--------|--------|--------|--------|--------|--------|
|             |                                         | Week 0 | Week 4 | Week 0 | Week 4 | Week 0 | Week 4 |
|             | Hemoglobin (g/dL)                       | 12.9   | 12.9   | 13.8   | 13.8   | 13.6   | 13.6   |
|             | Ferritin (ng/mL)                        | 30.0   | 28.0   | 27.0   | 36.0   | 35.0   | 44.0   |
|             | % max iron abs                          | 1.7    | 2.7    | 9.2    | 9.6    | -1.6   | 3.7    |
|             | iAUC ( $\mu\text{g/dL}\cdot\text{hr}$ ) | 2.0    | 19.2   | 44.3   | 53.8   | 4.0    | 18.5   |
|             | Hemoglobin (g/dL)                       | 13.6   | 13.9   | 13.1   | 12.7   | 13.6   | 14.2   |
|             | Ferritin (ng/mL)                        | 7.0    | 8.0    | 8.0    | 7.0    | 10.0   | 9.0    |
|             | % max iron abs                          | 16.2   | 24.2   | 9.3    | 17.5   | 13.9   | 17.3   |
|             | iAUC ( $\mu\text{g/dL}\cdot\text{hr}$ ) | 1208.6 | 652.8  | 789.9  | 1146.9 | 382.8  | 417.4  |
|             | Hemoglobin (g/dL)                       | 13.7   | 14.1   | 13.7   | 13.7   | 13.6   | 13.6   |
|             | Ferritin (ng/mL)                        | 24.0   | 28.0   | 19.0   | 38.0   | 22.0   | 28.0   |
|             | % max iron abs                          | 21.7   | 16.9   | 24.6   | 14.2   | 16.0   | 13.2   |
|             | iAUC ( $\mu\text{g/dL}\cdot\text{hr}$ ) | 270.8  | 63.3   | 171.0  | 55.7   | 103.1  | 129.0  |
|             | Hemoglobin (g/dL)                       | 13.6   | 12.9   | 13.2   | 13.4   | 12.9   | 13.0   |
|             | Ferritin (ng/mL)                        | 23.0   | 27.0   | 29.0   | 26.0   | 22.0   | 19.0   |
|             | % max iron abs                          | 9.2    | 0.9    | 7.9    | -6.5   | 11.5   | -2.7   |
|             | iAUC ( $\mu\text{g/dL}\cdot\text{hr}$ ) | 82.3   | 3.7    | 114.1  | -49.6  | 141.8  | -26.0  |
|             | Hemoglobin (g/dL)                       | 12.1   | 12.1   | 12.0   | 12.1   | 11.7   | 11.6   |
|             | Ferritin (ng/mL)                        | 23.0   | 21.0   | 26.0   | 20.0   | 26.0   | 30.0   |
|             | % max iron abs                          | -11.5  | 0.9    | -2.6   | 3.6    | -7.1   | 2.1    |
|             | iAUC ( $\mu\text{g/dL}\cdot\text{hr}$ ) | 0.0    | -29.2  | 0.0    | 45.3   | -60.5  | 27.6   |
|             | Hemoglobin (g/dL)                       | 14.0   | 13.2   | 13.1   | 12.9   | 13.2   | 12.7   |
|             | Ferritin (ng/mL)                        | 38.0   | 38.0   | 27.0   | 24.0   | 27.0   | 43.0   |
|             | % max iron abs                          | 23.9   | 22.2   | 23.9   | 25.0   | 18.9   | 15.6   |
|             | iAUC ( $\mu\text{g/dL}\cdot\text{hr}$ ) | 123.1  | 201.2  | 214.1  | 253.1  | 331.9  | 53.4   |
|             | Hemoglobin (g/dL)                       | 14.0   | 14.7   | 14.9   | 14.2   | 15.0   | 15.5   |
|             | Ferritin (ng/mL)                        | 88.0   | 70.0   | 94.0   | 66.0   | 111.0  | 109.0  |
|             | % max iron abs                          | 3.8    | 10.3   | 6.0    | 15.8   | 1.0    | 2.2    |
|             | iAUC ( $\mu\text{g/dL}\cdot\text{hr}$ ) | 7.9    | 35.0   | 10.8   | 26.0   | -4.2   | 4.3    |
|             | Hemoglobin (g/dL)                       | 12.7   | 13.6   | 12.6   | 13.2   | 12.8   | 12.8   |
|             | Ferritin (ng/mL)                        | 19.0   | 26.0   | 22.0   | 22.0   | 24.0   | 22.0   |
|             | % max iron abs                          | 28.8   | 5.2    | 20.4   | 23.5   | 17.4   | 15.3   |
|             | iAUC ( $\mu\text{g/dL}\cdot\text{hr}$ ) | 389.4  | 47.2   | 300.6  | 319.4  | 231.3  | 342.6  |
|             | Hemoglobin (g/dL)                       | 12.8   | 13.0   | 13.1   | 13.2   | 13.0   | 13.0   |
|             | Ferritin (ng/mL)                        | 23.0   | 44.0   | 30.0   | 34.0   | 30.0   | 21.0   |
|             | % max iron abs                          | 25.6   | 17.5   | 17.0   | 8.9    | 26.8   | 24.2   |
|             | iAUC ( $\mu\text{g/dL}\cdot\text{hr}$ ) | 1770   | 600    | 1515   | 2835   | 1065   | 1440   |
|             | Hemoglobin (g/dL)                       | 12.9   | 13.6   | 13.9   | 13.8   | 13.1   | 12.9   |
|             | Ferritin (ng/mL)                        | 14.0   | 18.0   | 17.0   | 19.0   | 14.0   | 22.0   |
|             | % max iron abs                          | 9.4    | 19.2   | 9.0    | 12.9   | 22.7   | 15.4   |
|             | iAUC ( $\mu\text{g/dL}\cdot\text{hr}$ ) | 62.8   | 327.2  | 91.9   | 91.3   | 336.3  | 85.5   |
|             | Hemoglobin (g/dL)                       | 12.8   | 12.6   | 13.0   | 14.1   | 14.3   | 14.4   |
|             | Ferritin (ng/mL)                        | 100.0  | 157.0  | 95.0   | 118.0  | 119.0  | 142.0  |
|             | % max iron abs                          | 10.9   | -3.0   | 8.2    | 12.1   | 4.0    | 6.5    |
|             | iAUC ( $\mu\text{g/dL}\cdot\text{hr}$ ) | 23.6   | 3.3    | 24.9   | 29.3   | 8.8    | 14.1   |

iAUC: incremental iron under the curve
